# Supplementary material
Source: PubMed Central journal article supplement (PMC2836059)

## Legends to Supplemental Materials

**Supplementary Table.** Sequence of CRT C-terminal domain of different species. Negatively and positively charged residues are colored in blue and red, respectively.

**Supplemental Figure 1.** Effect of calcium on the TFE-induced structure of C-domain. (A) Far-UV CD spectra recorded in the presence of 20 mM  $\text{Ca}^{2+}$  and/or 18 % TFE. (B) Ellipticity at 222 nm for increasing TFE concentrations in the presence and absence of 20 mM  $\text{Ca}^{2+}$ .

**Supplemental Figure 2.** Comparison of the far-UV CD spectrum of CRT C-t with the spectrum resulting from the addition of its constituent parts, Wt-C and Wt-N, at (A) 5  $\mu\text{M}$  and (B) 22 mM  $\text{CaCl}_2$ .

**Supplemental Figure 3.** Molecular dynamics simulation of a random peptide. (A) Moment of inertia and (B) end-to-end distance in the presence of calcium (solid line) or sodium (dotted line). Straight horizontal lines are the calculated average values for each condition after 5 ns of equilibration. (C) Number of ion-peptide contacts for calcium (black bars) and sodium (gray bars).

**Supplemental Figure 4.** Fourier transform analysis of the charge distribution along the CRT C-t of selected species and the random domain Rd.

**Supplemental Figure 5.**  $\alpha$ -helix propensities of CRT-Ct and Rd as predicted by Agadir.

## Supplemental Table.

|                                                   |                                                                 |
|---------------------------------------------------|-----------------------------------------------------------------|
| Mus musculus (Mouse)                              | MKDKQDEEQRLLKEEEEDKKRKEEEEAEDKEDDDDRDEDEDEDEKKEDEEESPGQAKDEL    |
| Oryctolagus cuniculus (Rabbit)                    | MKDKQDEEQRLLKEEEEEKKRKEEEEAEDEDEDKDDKEDDEDEDEKDEEEEAAGQAKDEL    |
| Homo sapiens (Human)                              | MKDKQDEEQRLLKEEEEDKKRKEEEEAEDEDEDKDEDEDEDEKKEDEEEDVPGQAKDEL     |
| Xenopus tropicalis (Western clawed frog)          | MKEQQDEEDRKKQEEEEKKRKDEEPQEEEEDDDEEEKKEEKEEEDEEETPLKDEL         |
| Danio rerio (Zebrafish)                           | MKDEQEKKRKEEEKNKEQNTAADEEEDEGEEEEEEDETEEPQDEGEDVLRKDEL          |
| Haemaphysalis qinghaiensis                        | MKDKQEDEEAKSKKEDDAKDEEFDDEEKKDDEEAETTPAPGEEDDDHKHEEL            |
| Ixodes scapularis (Black-legged tick)             | MKEQQDEKEDKAEKKKDEKDEDFEEDDEDKKEDEEAPAGGDAEEHHQHDHEEL           |
| Fenneropenaeus chinensis (Fleshy prawn)           | MKDEQDEEERKRAEEEAACAADAEKDEEDDDDDDLGDEDEDLNDLHDEL               |
| Eisenia foetida (Common brandling worm)           | MKDKFDEEERKKREEEKKRKEEKDDGGAEEEDEDDDEDGDKDEKDDSETAEDKADDASQKDEL |
| Strongylocentrotus purpuratus (Purple sea urchin) | MKDEQDAEERKQREEDKRRKEEGDDEEGDEDEDLMDLDDLMDGFEDEEEEEEELQRDEL     |
| Nematostella vectensis (Starlet sea anemone)      | MKDEQDEIERKKAEEEKKRKEEESKKKDEKKEEED                             |
| Drosophila melanogaster (Fruit fly)               | MKEAQDEVQRKKDEEAKKASDKDDEDEDDDEEKDDESKQDKDQSEHDEL               |
| Aedes aegypti (Yellowfever mosquito)              | IKEAQEAERKKAEEEAKAEDAEDKDDDELDDDEEENTLGEAEVEEGHDEL              |
| Caenorhabditis elegans                            | DKLKTVEKKEKKADEETRKAEFEARKKAEEKKAKKDDDEEKEEEEGHDEL              |
| Trypanosoma cruzi                                 | KVMEDMEKERRKKEEEREKKEKNPEEKDEEELKGRDKEDL                        |
| Ricinus communis (Castor bean)                    | KNKDAEKAAFEEAEKKKEEESKDDPADSDAEDDDDDADTEGEDDGESKSDAAEDSAEDVHDEL |
| <u>Zea mays (Maize)</u>                           | GKHKEAEKAAFDEAEKKKEEEDAAGGDEDDDLLEDEDEKAEDEKADSDAEDSKSDDEKQHDEL |
| <u>Euglena gracilis</u>                           | KDAEKKAFDSAEADKKRKEEDERKKQEEEEKKTAEEDEDDDEEEDDKDEL              |

# Supplemental Figure 1

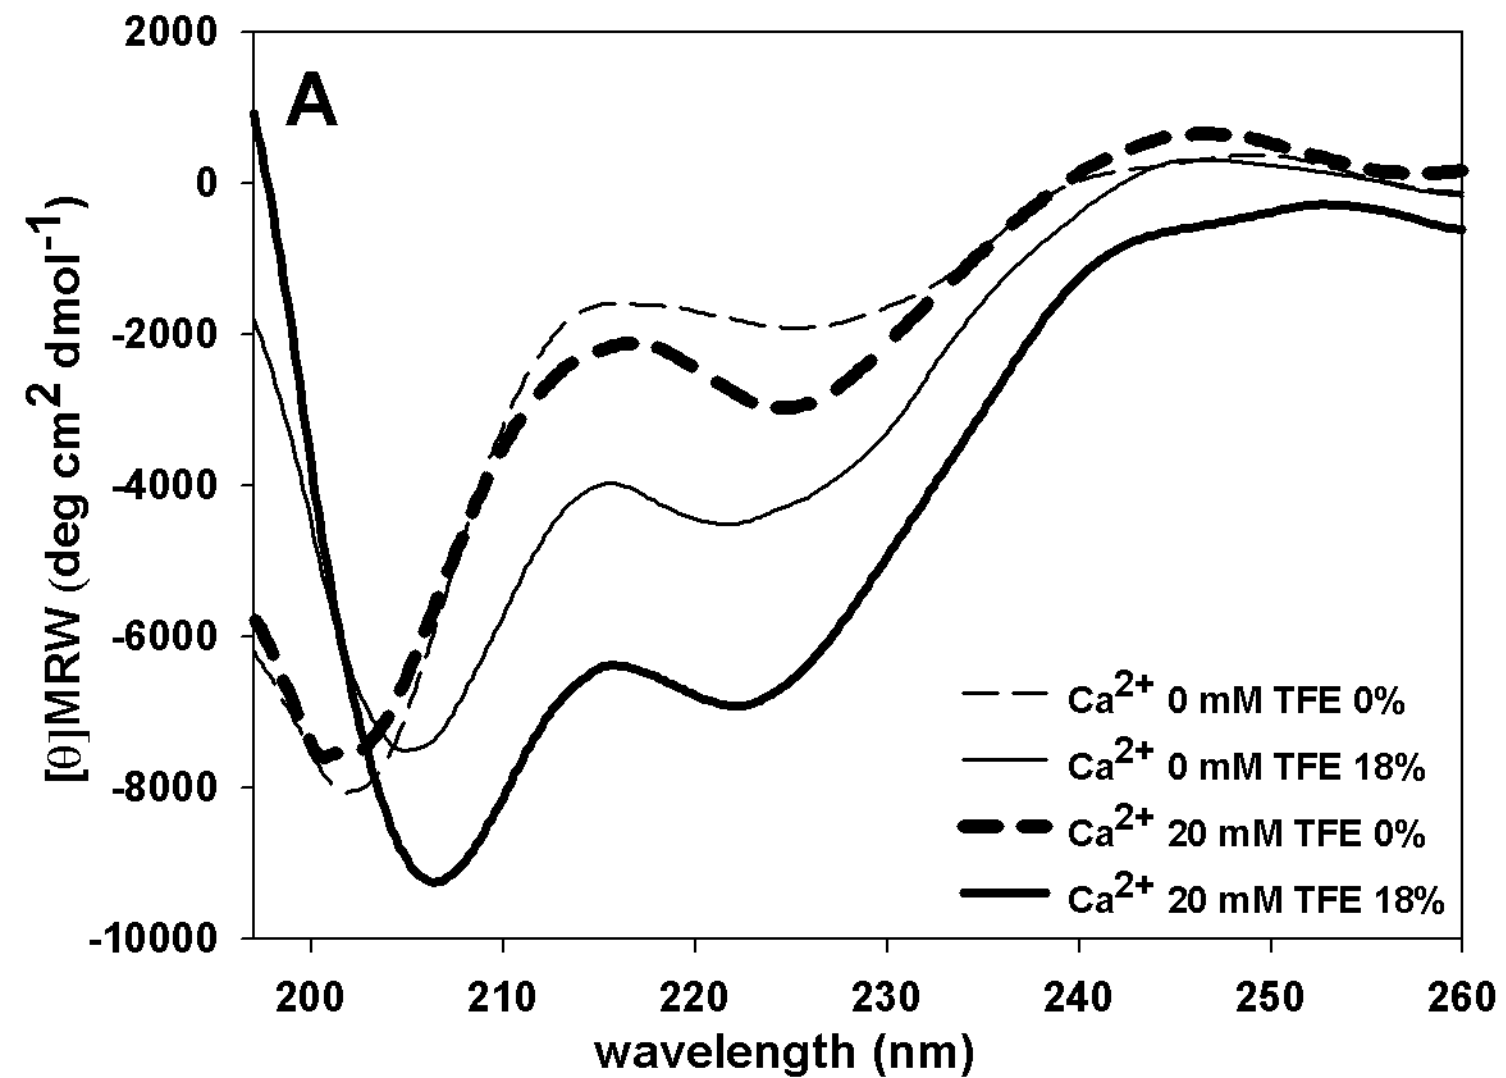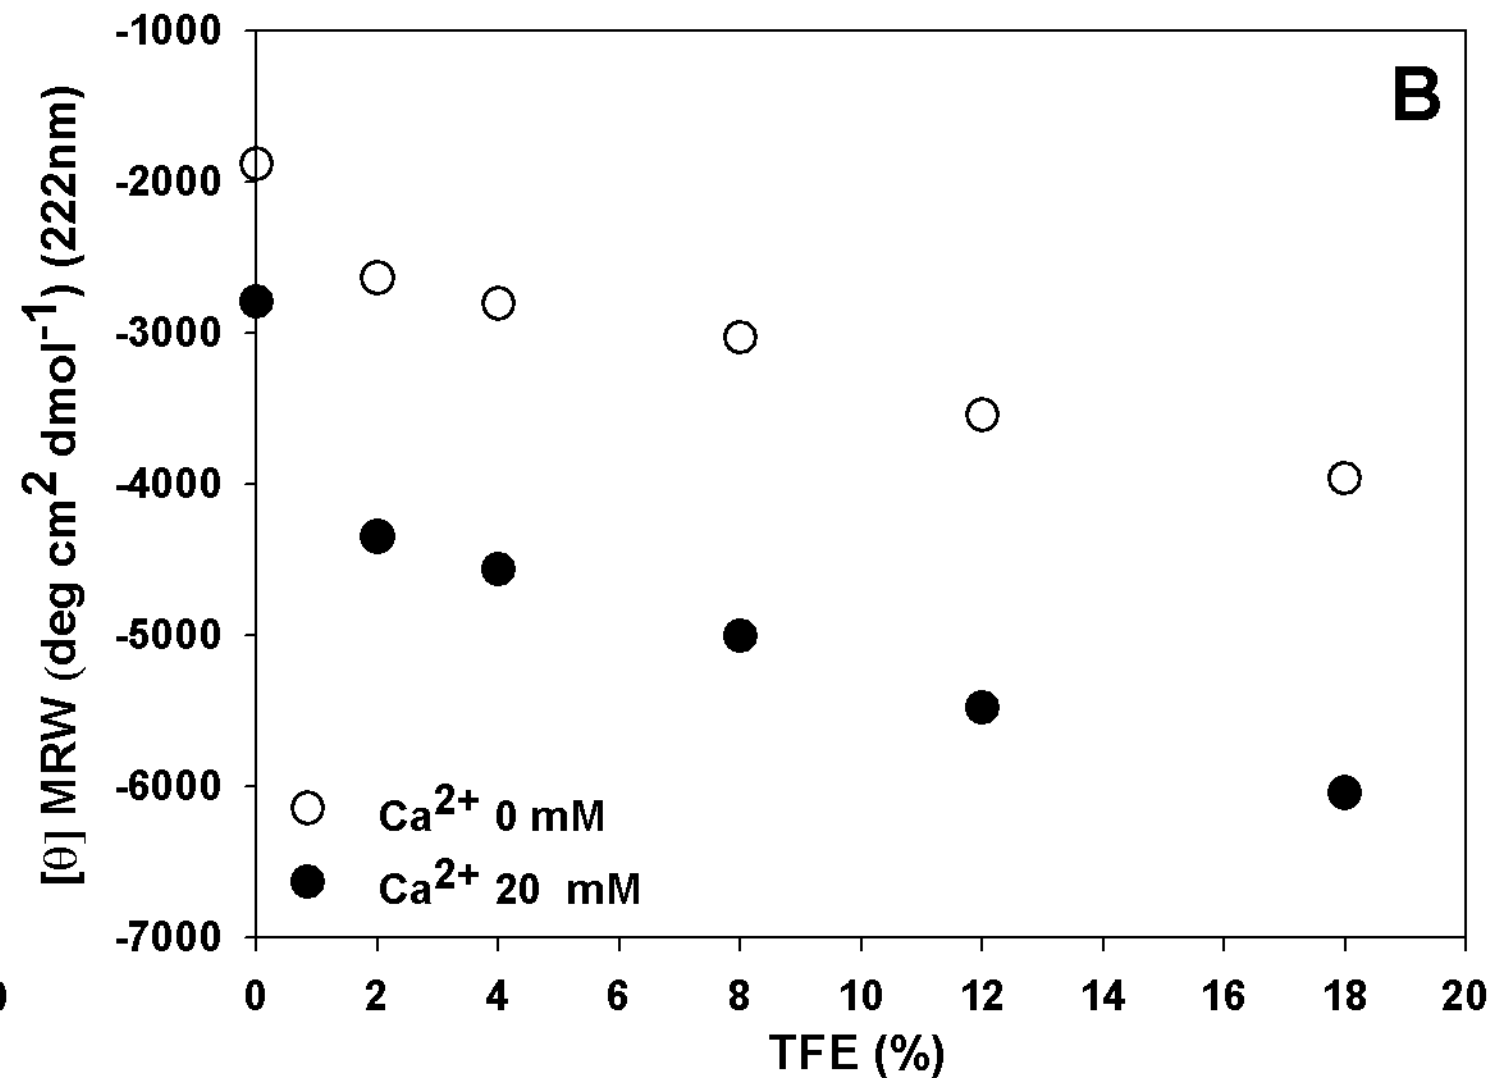

## Supplemental Figure 2

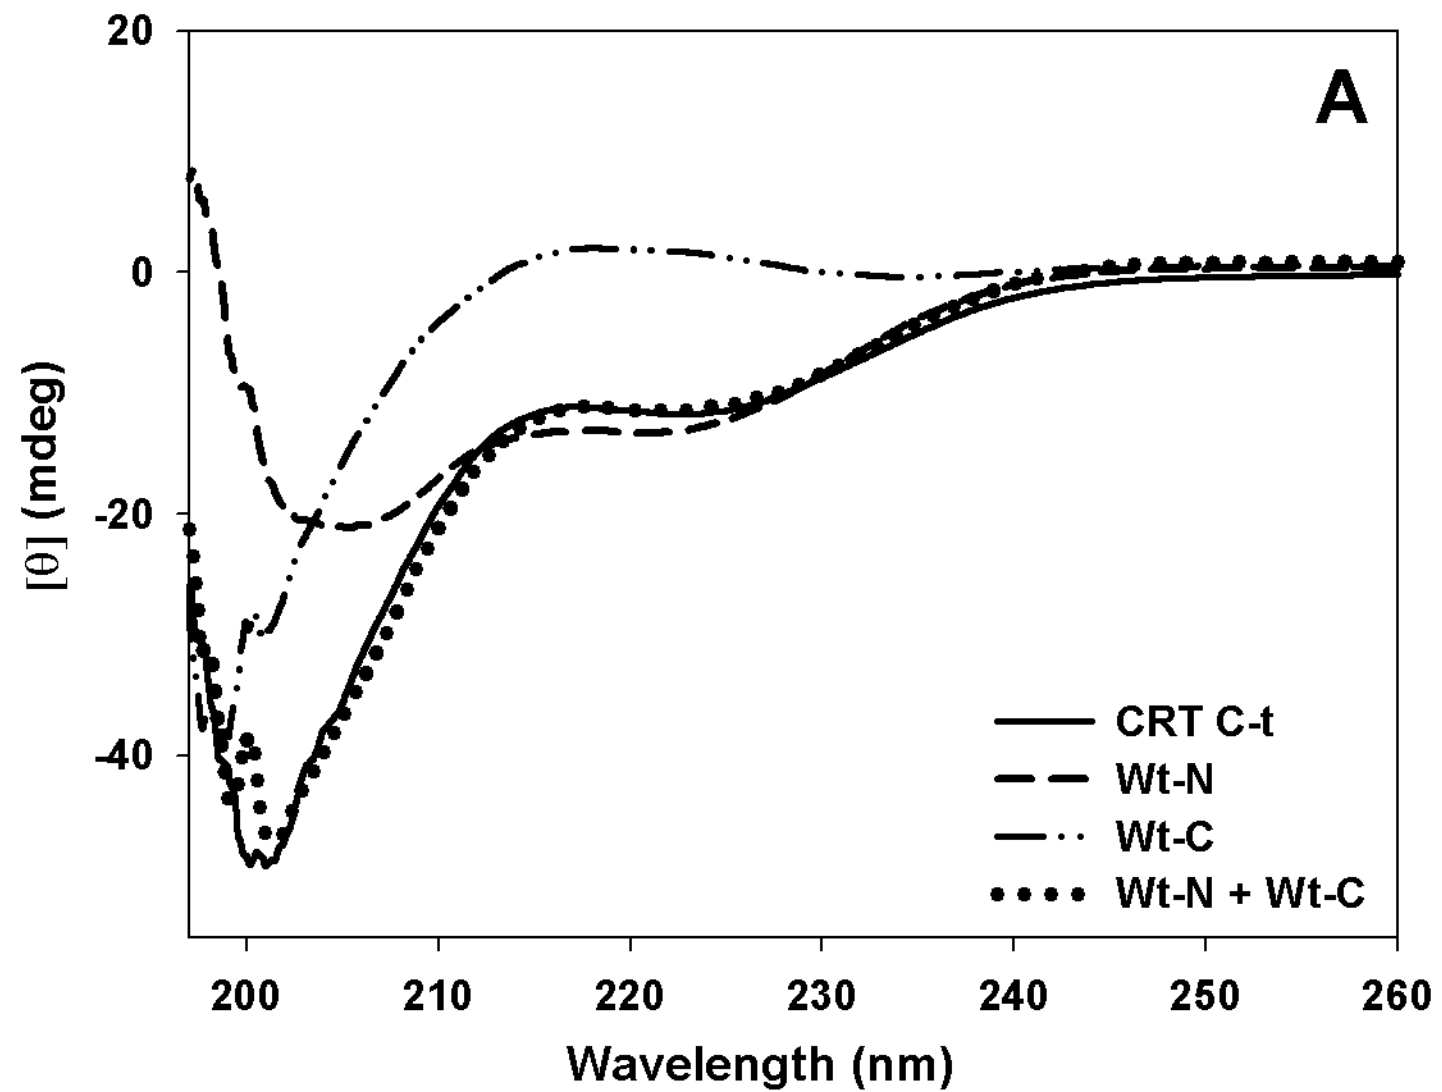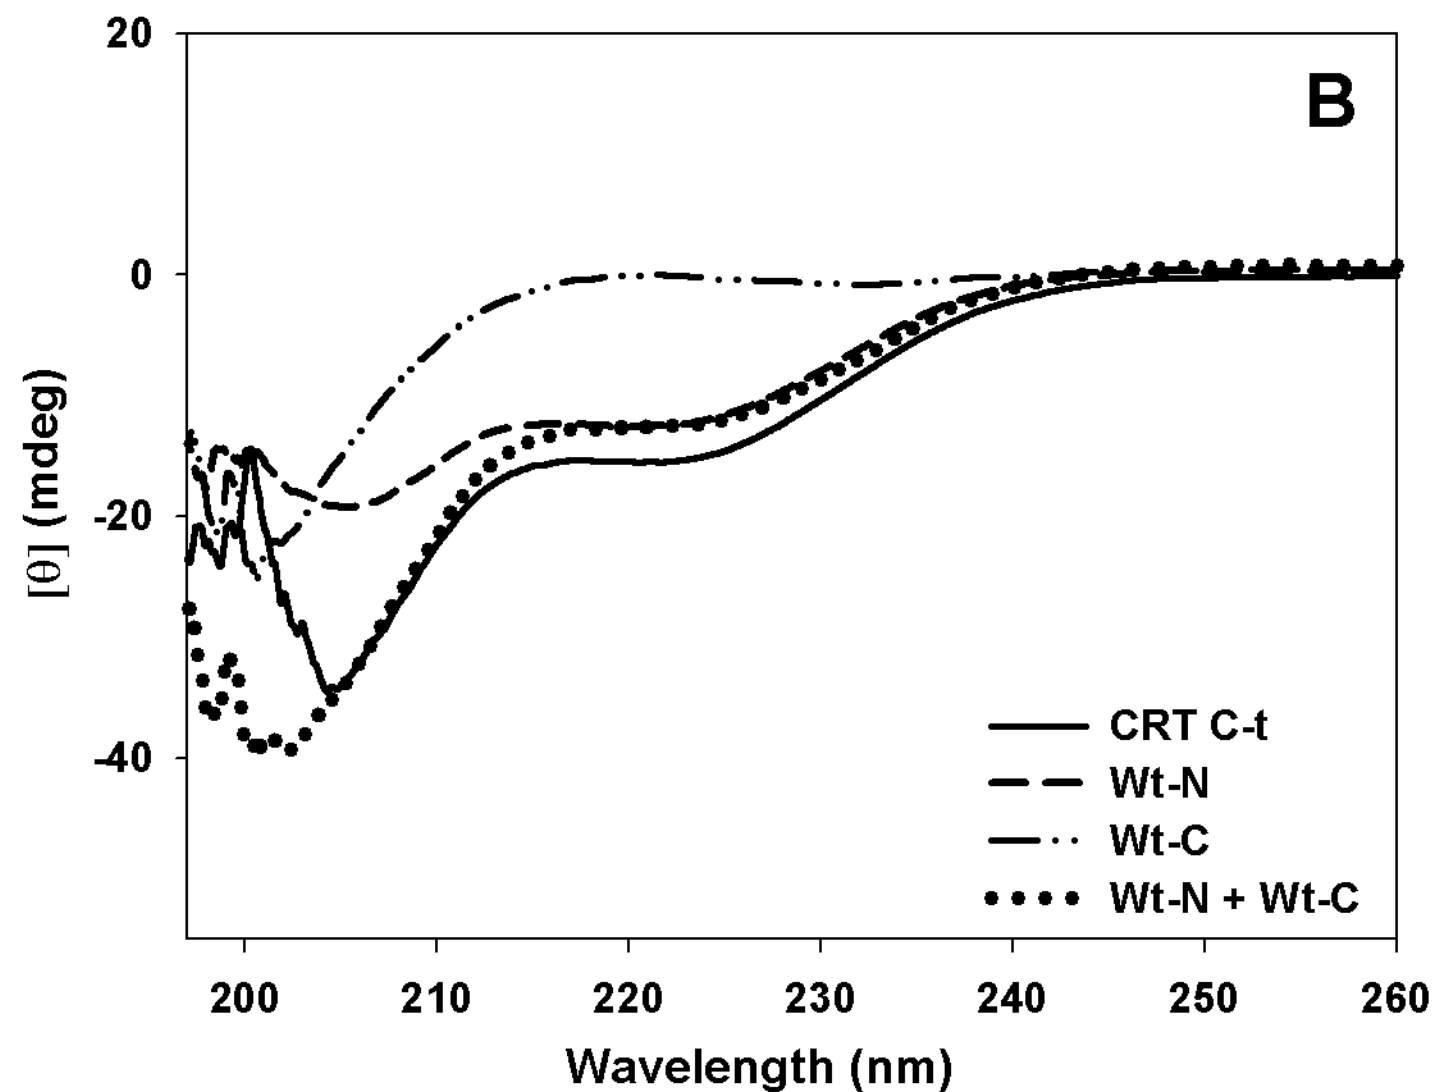

# Supplemental Figure 3

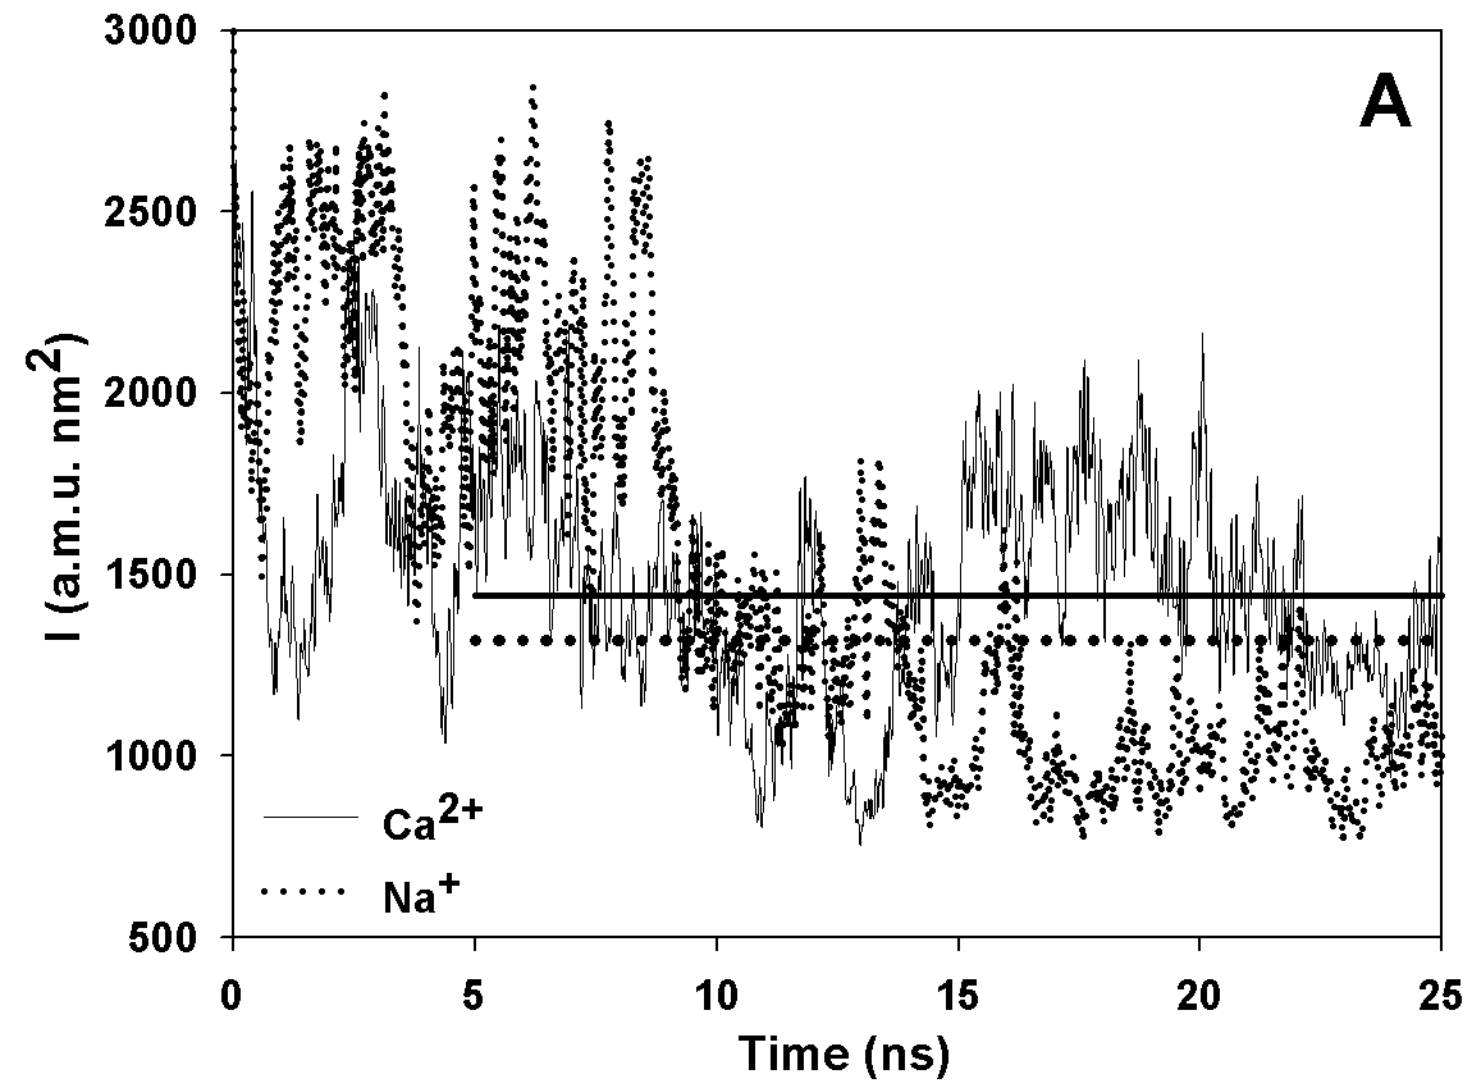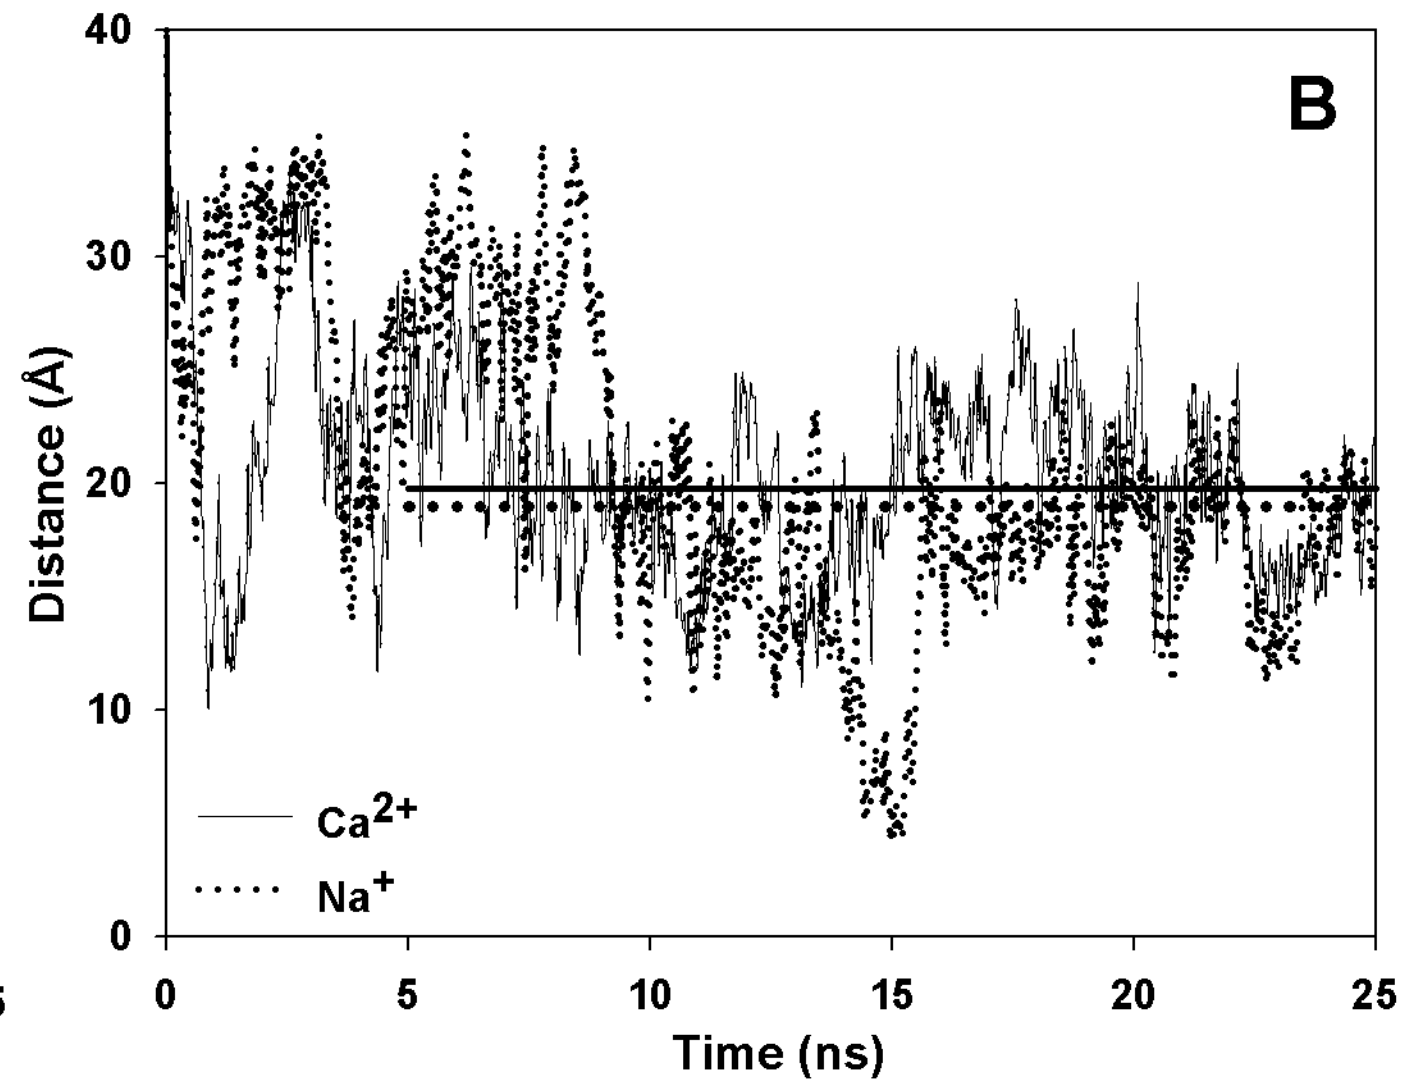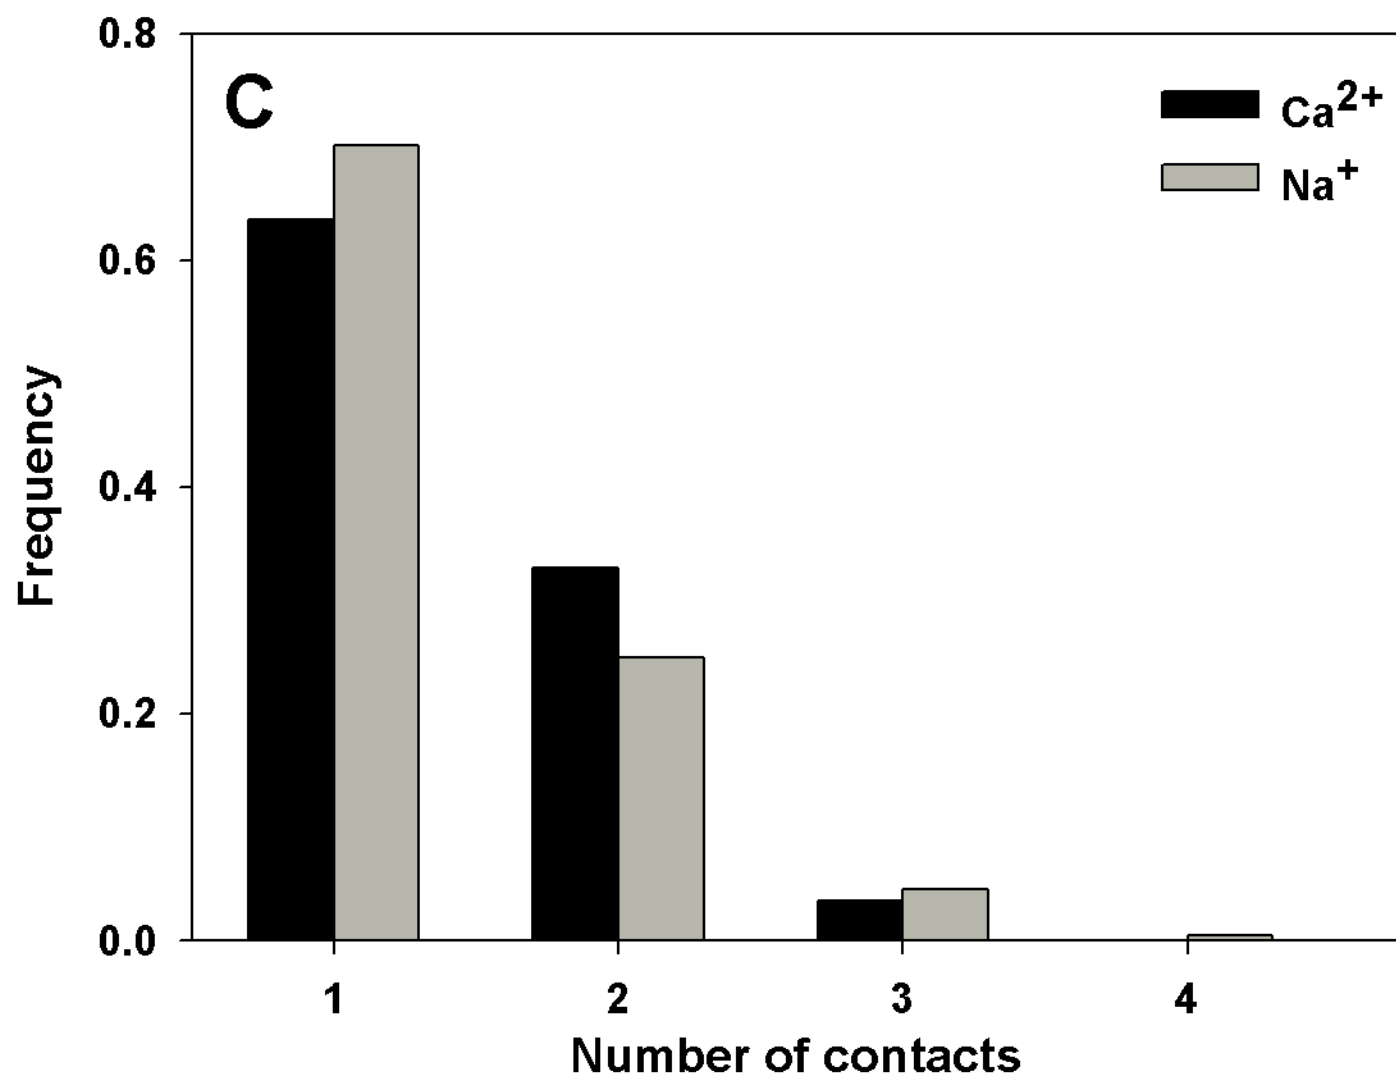

# Supplemental Figure 4

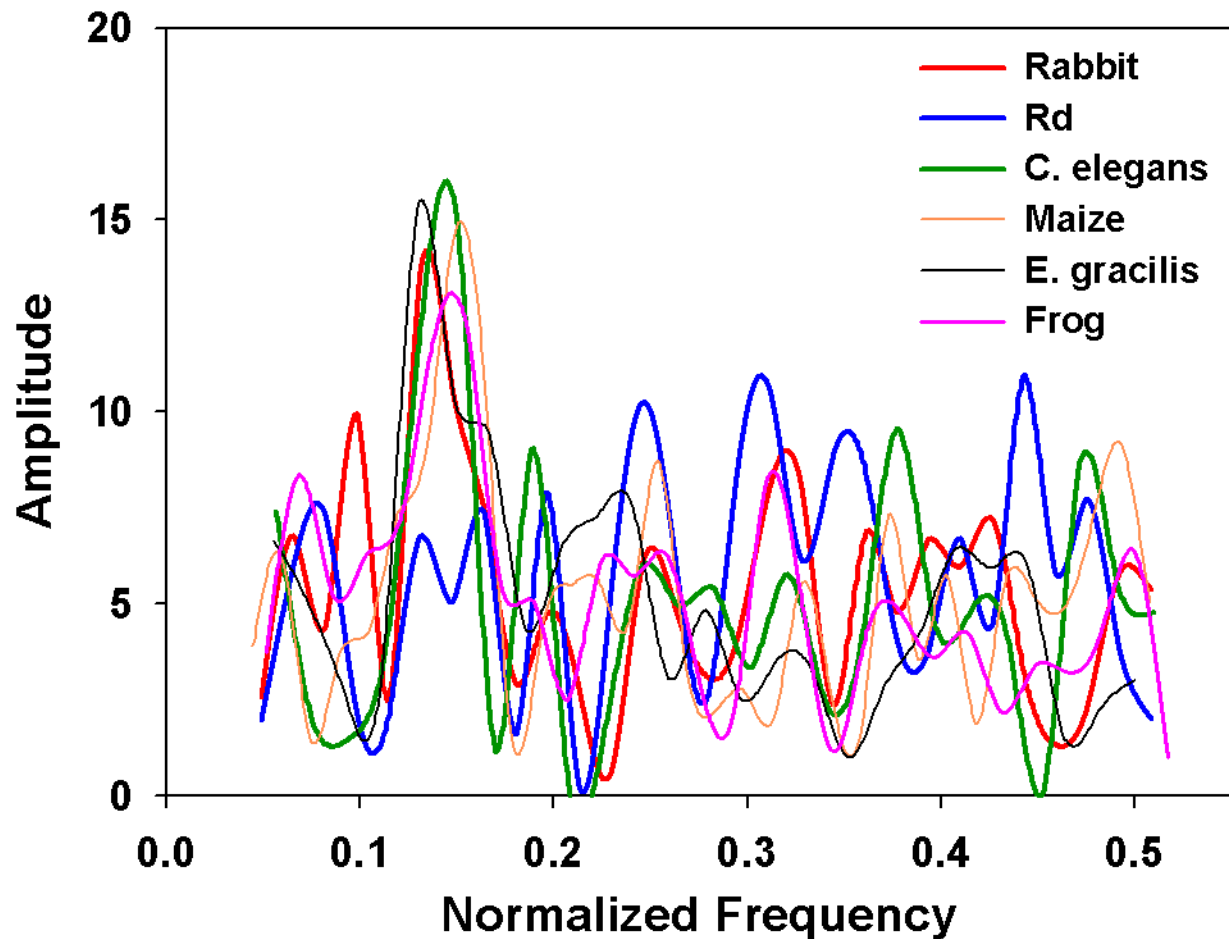

# Supplemental Figure 5

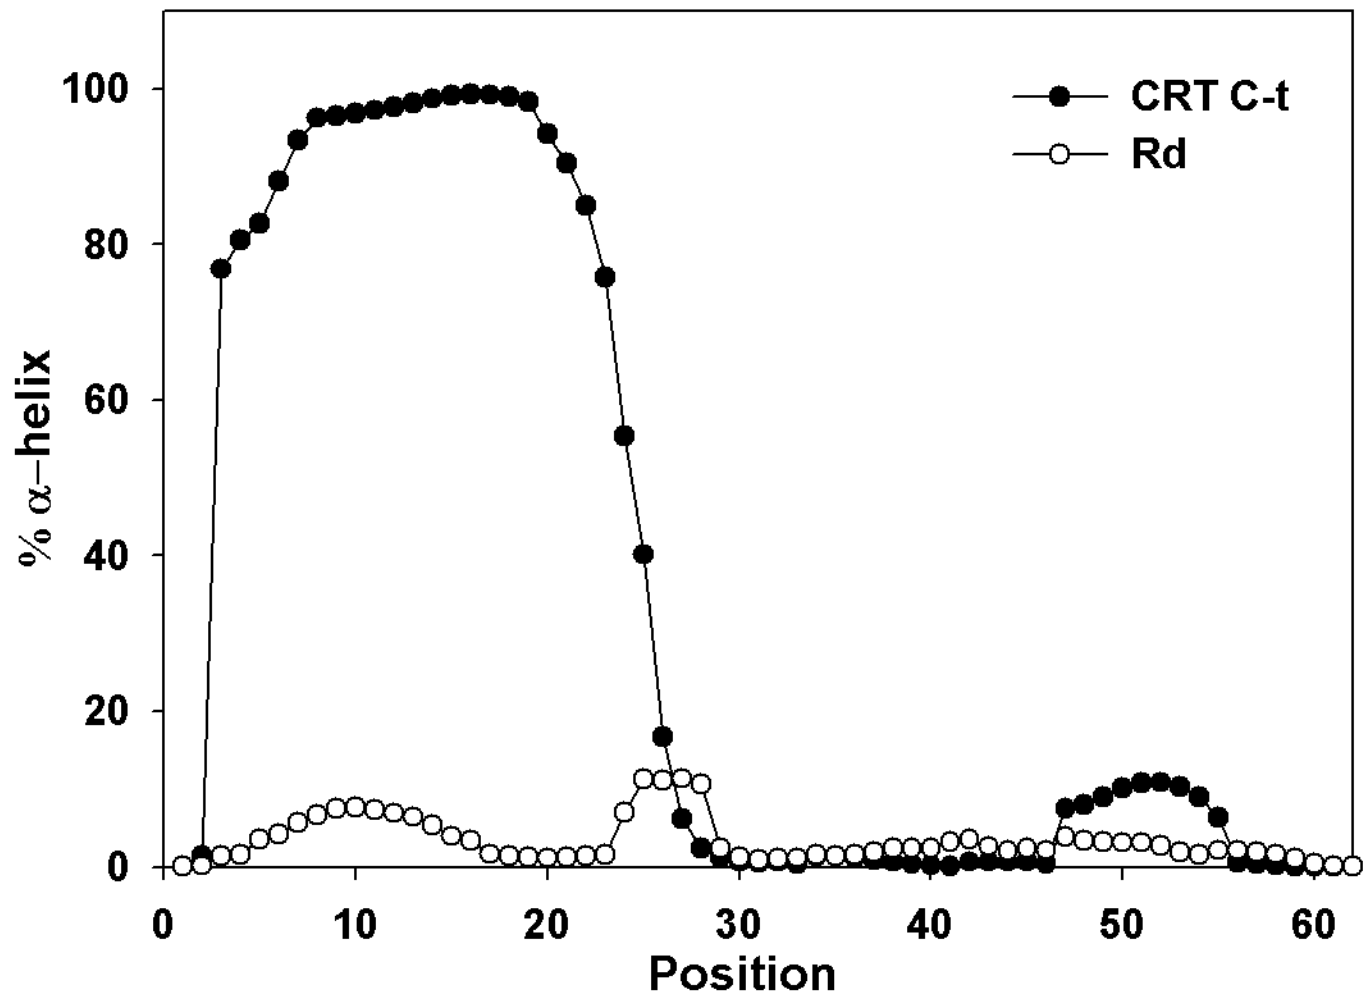

Supplement: supp_M109.034512_jbc.M109.034512-1.pdf [file supp_M109.034512_jbc.M109.034512-1.pdf]
